# Supplementary figures and images for: Work Fluctuations in Ergotropic Heat Engines
Source: Preprints.org preprint supplement (doi:10.20944/preprints202310.0879.v1), 2023-10-13

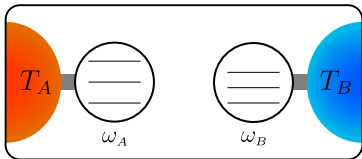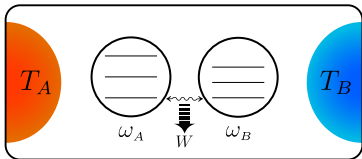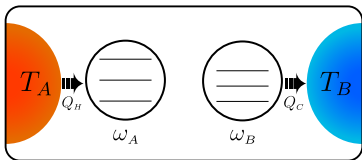

Supplement: Supplementary file 1 [file supplementary]
